# Supplementary material
Source: ML conference proceedings conference paper supplement (https://aclanthology.org/2024.latechclfl-1.28)

Fine-tuned LM performance at different training sizes

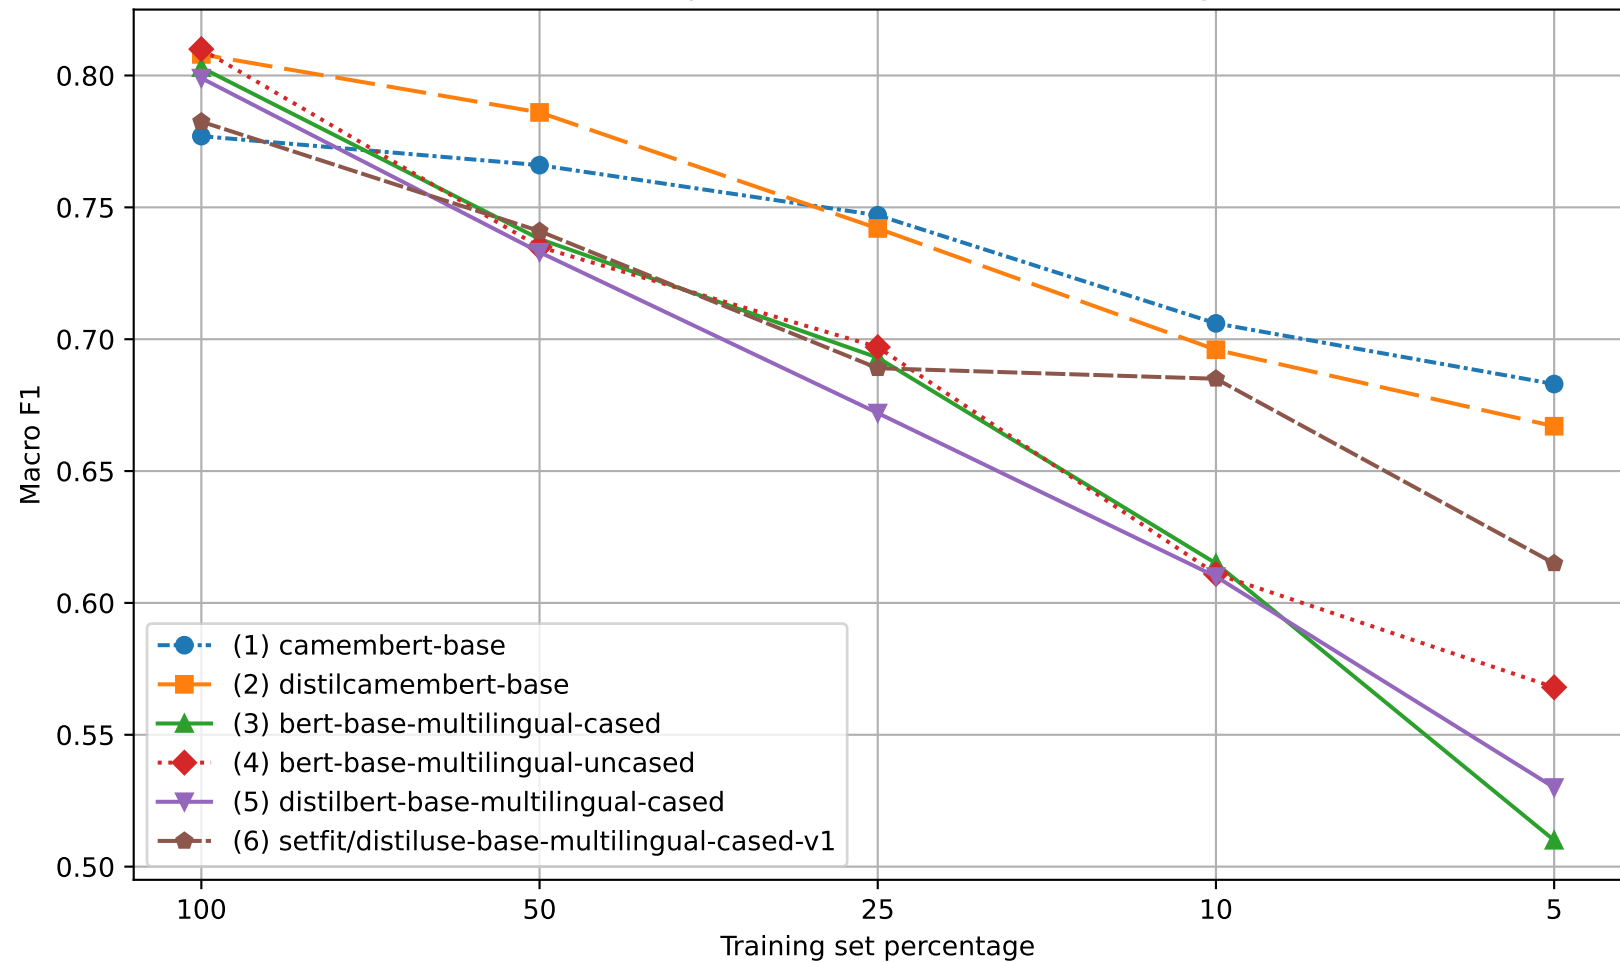

Supplement: SupplementaryMaterial [file 2024.latechclfl-1.28.SupplementaryMaterial.zip]
